# Supplementary material
Source: Springer Nature journal article supplement (https://www.springermedizin.de/resource/supplementary/13063_2014_2366_MOESM4_ESM.pdf/9621984)

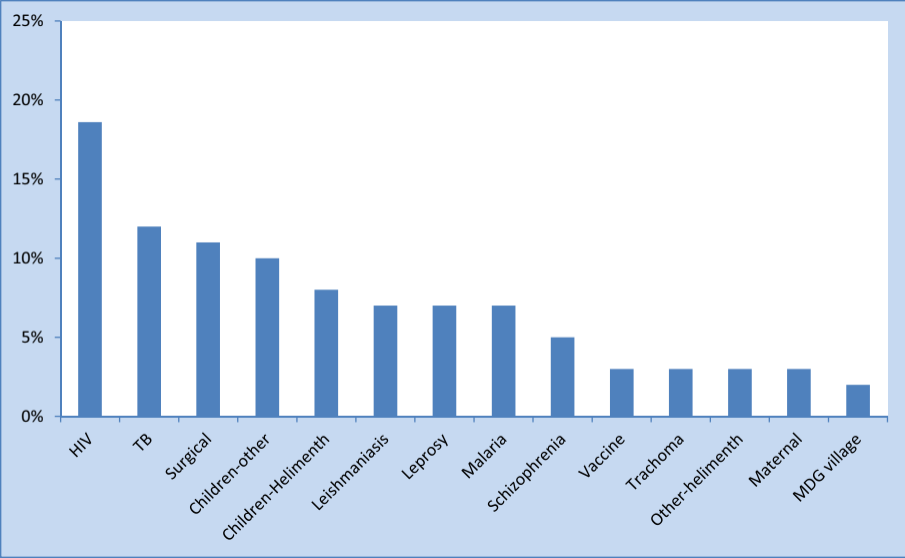

Supplement: MOESM4 [file 9621984]
